# Supplementary material
Source: PubMed Central journal article supplement (PMC5679239)
Supplement: NIHMS899871-supplement-s1.pdf [file NIHMS899871-supplement-s1.pdf]

Figure S1

A

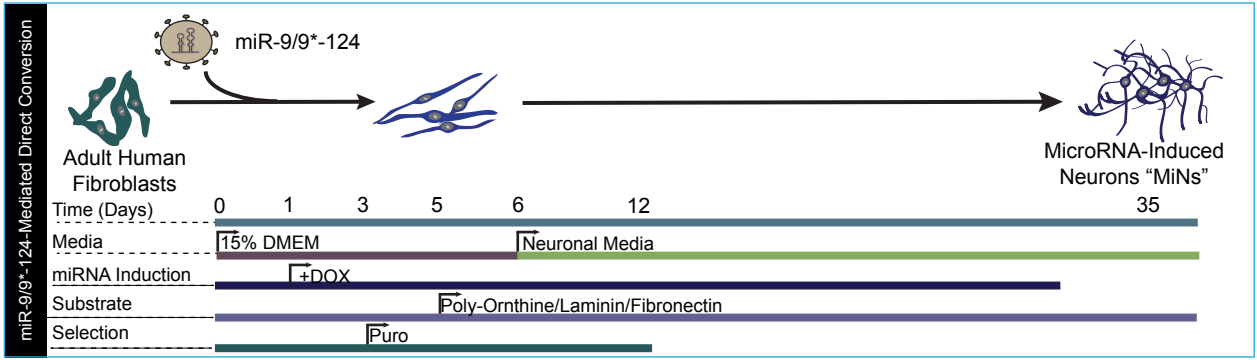

B

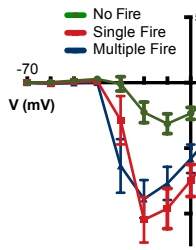

C

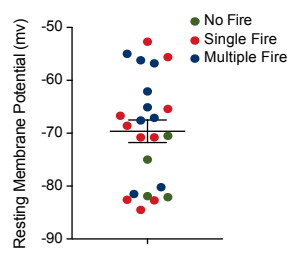

D

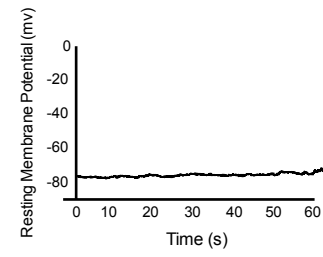

E

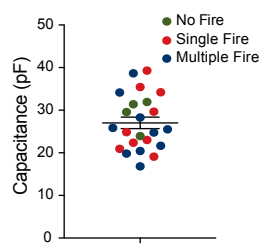

F

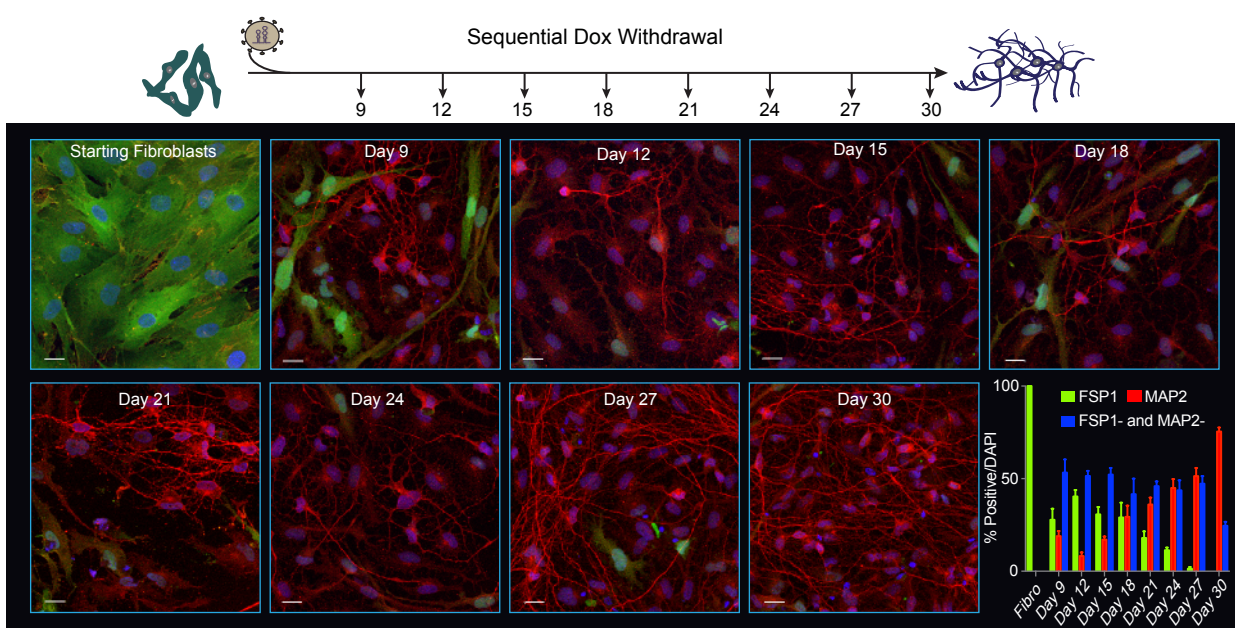

G

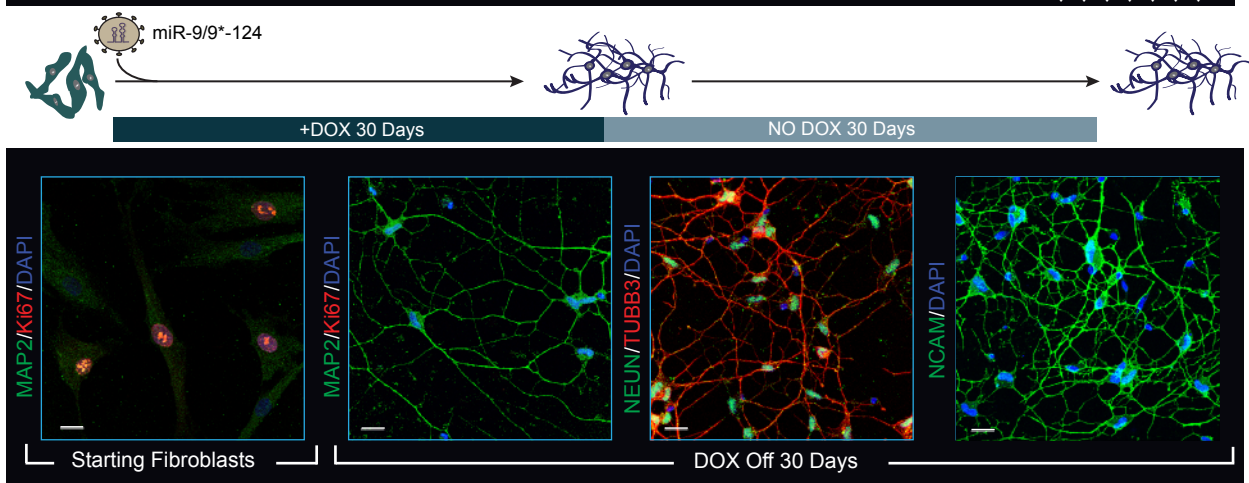

Figure S2

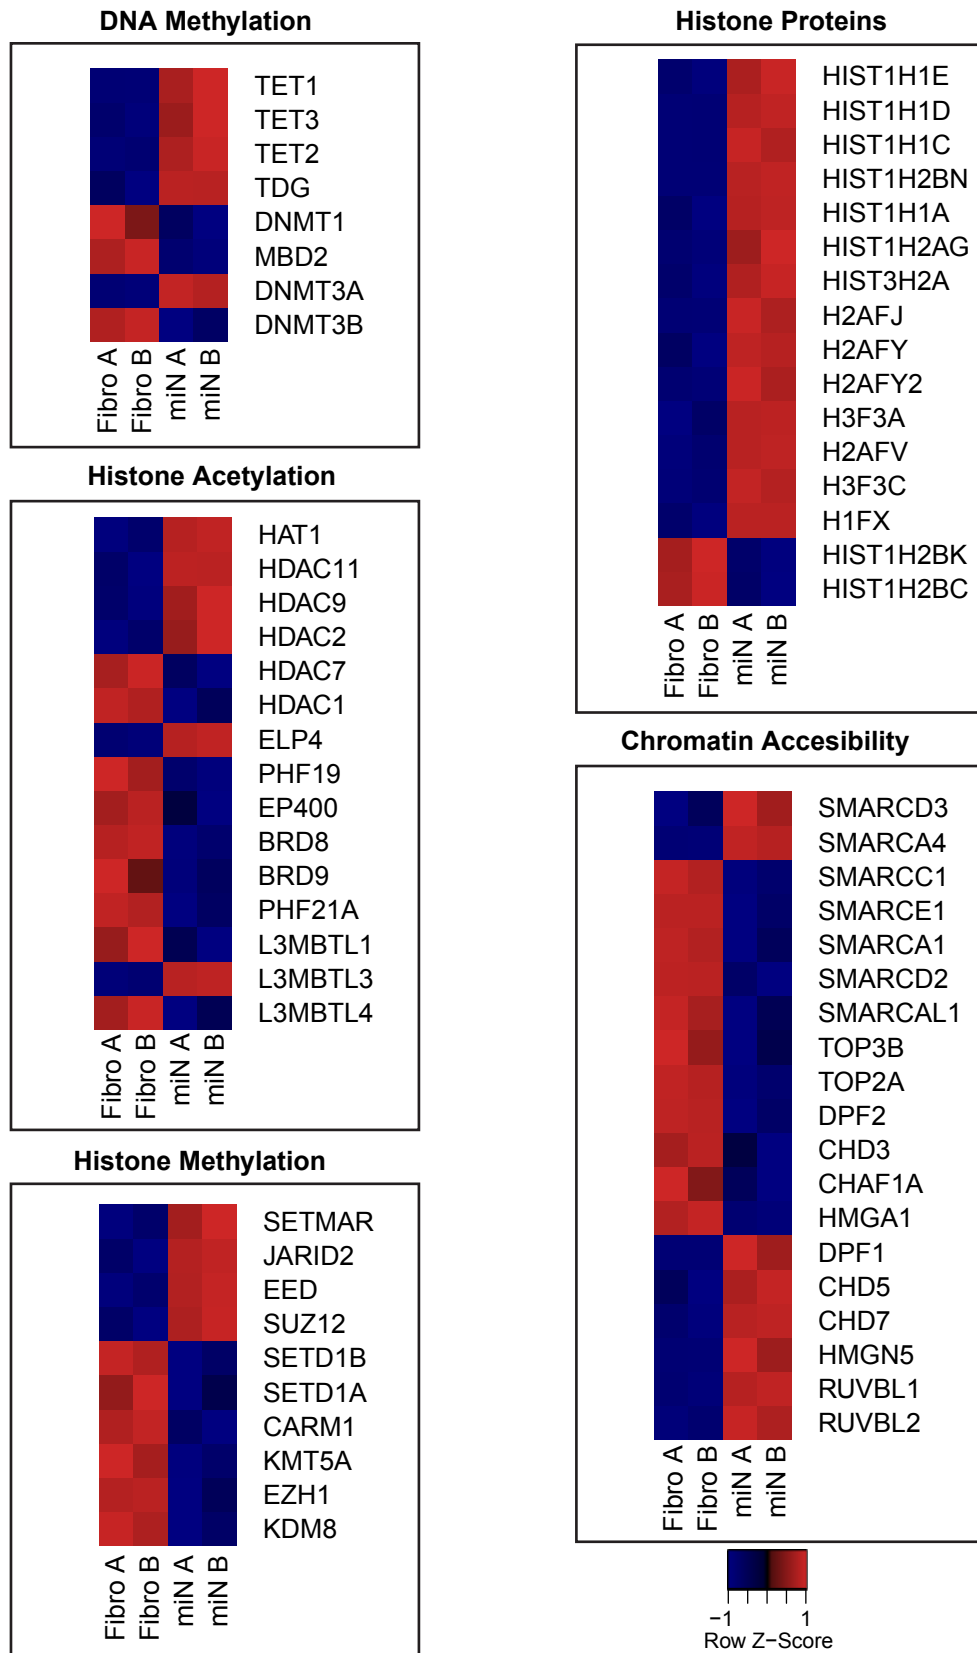

Figure S3

A

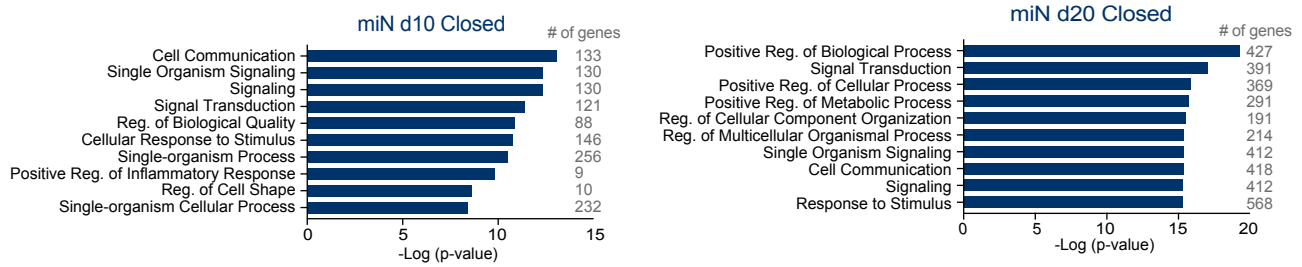

B

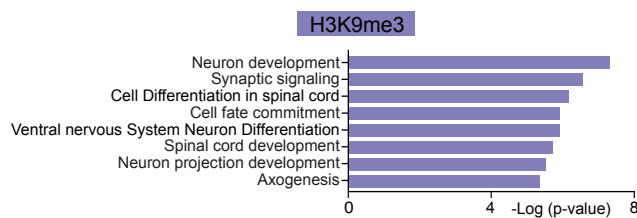

C

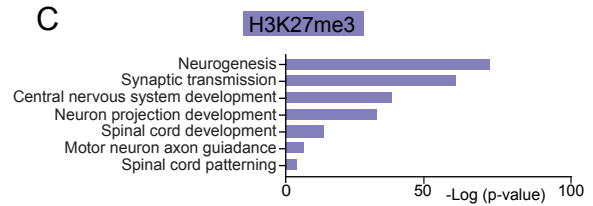

D

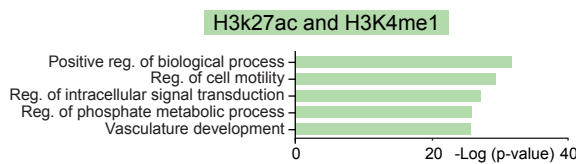

E

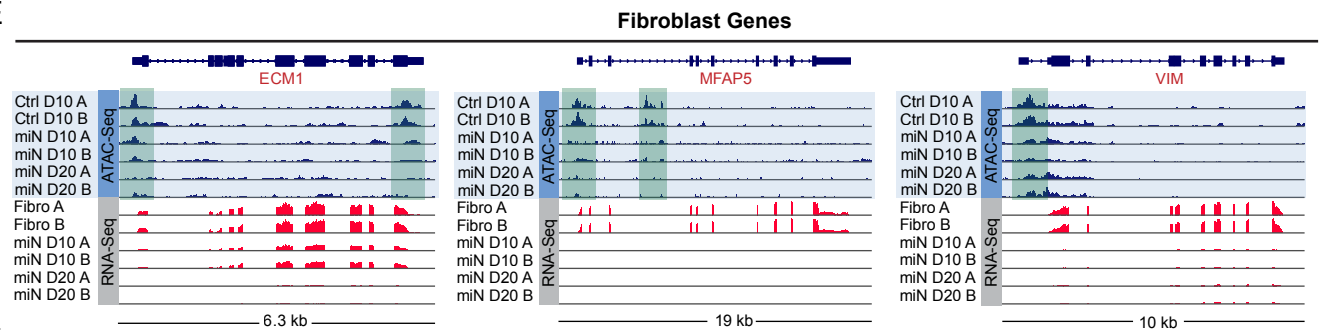

F

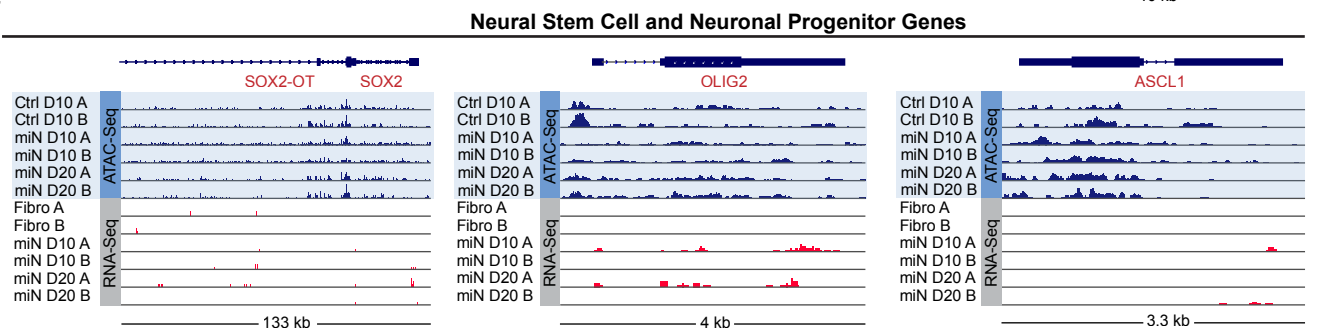

G

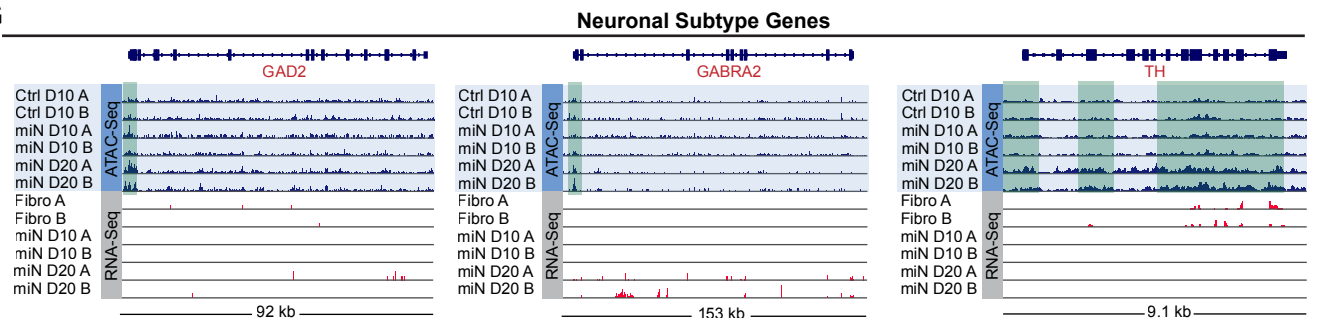

Figure S4

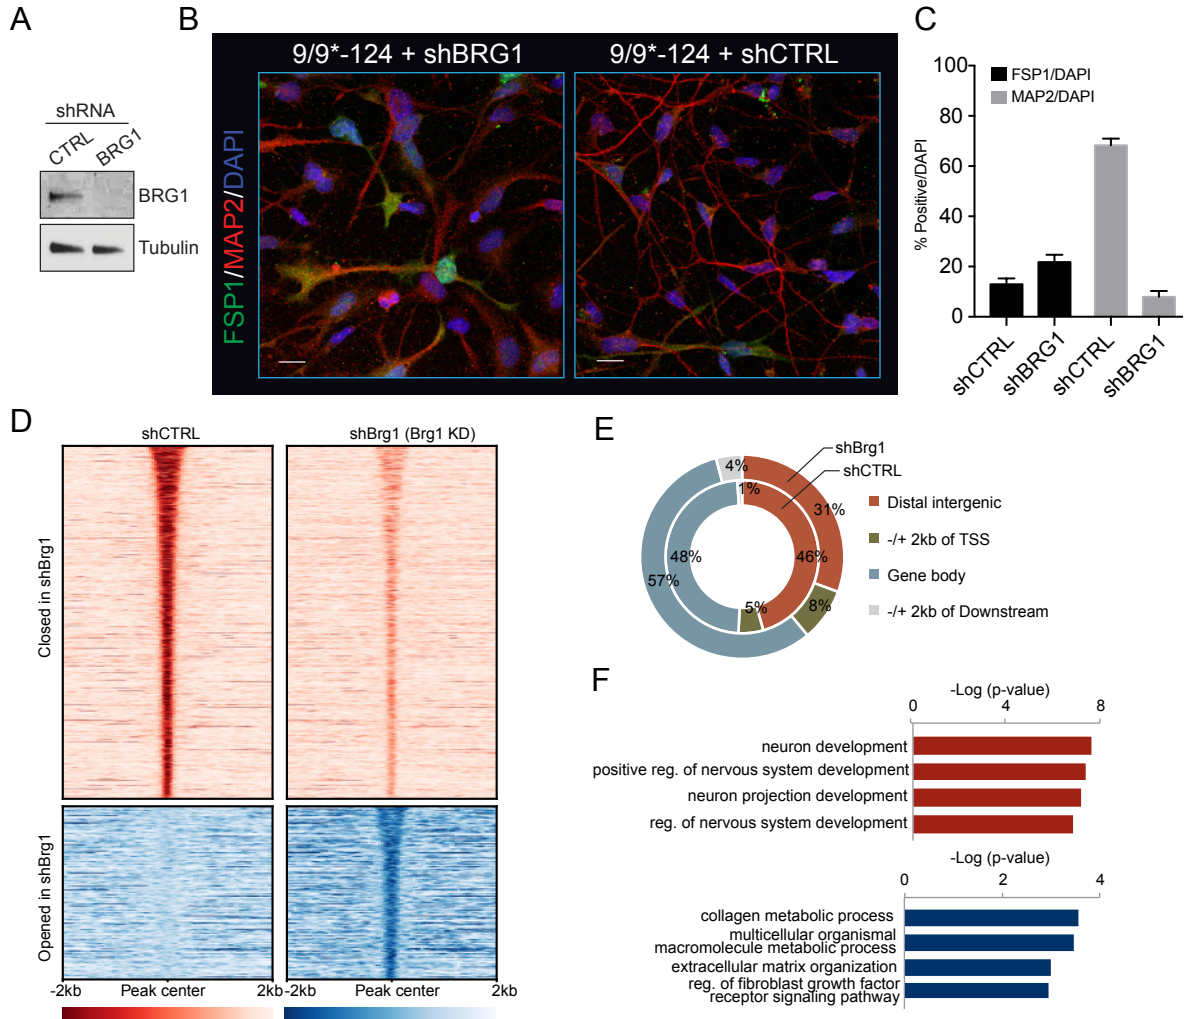

Figure S5

A

**TF's Tested with miR-9/9\*-124**

|                                  |                                |
|----------------------------------|--------------------------------|
| ISL1                             | NGN2 OLIG2 RXRG RAR $\beta$    |
| LHX3a                            | NGN2 RXRG RAR $\beta$          |
| ISL1 LHX3a                       | NKX 2.2                        |
| ND2                              | NKX 6.2                        |
| NGN2                             | NKX 6.2 Isl1                   |
| NGN2 ISL1                        | NKX 6.2 LHX3a                  |
| NGN2 ISL1 RXRG RAR $\beta$       | OLIG2                          |
| NGN2 LHX3a                       | OLIG2 ISL1                     |
| NGN2 LHX3a ISL1                  | OLIG2 LHX3a                    |
| NGN2 LHX3a ISL1 RXRG RAR $\beta$ | OLIG2 NKX 6.2                  |
| NGN2 LHX3a RXRG RAR $\beta$      | OLIG2 NKX 6.2 RXRG RAR $\beta$ |
| NGN2 OLIG2                       | OLIG2 NKX6.2 ISL1              |
| NGN2 OLIG2 ISL1                  | RXRG RAR $\beta$               |
| NGN2 OLIG2 ISL1 RXRG RAR $\beta$ |                                |

B

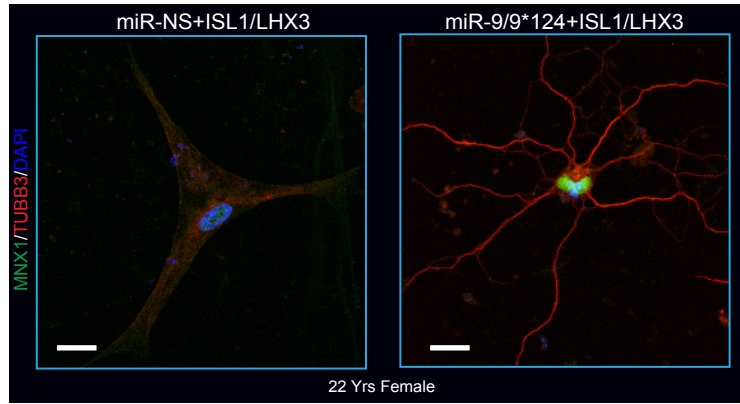

C

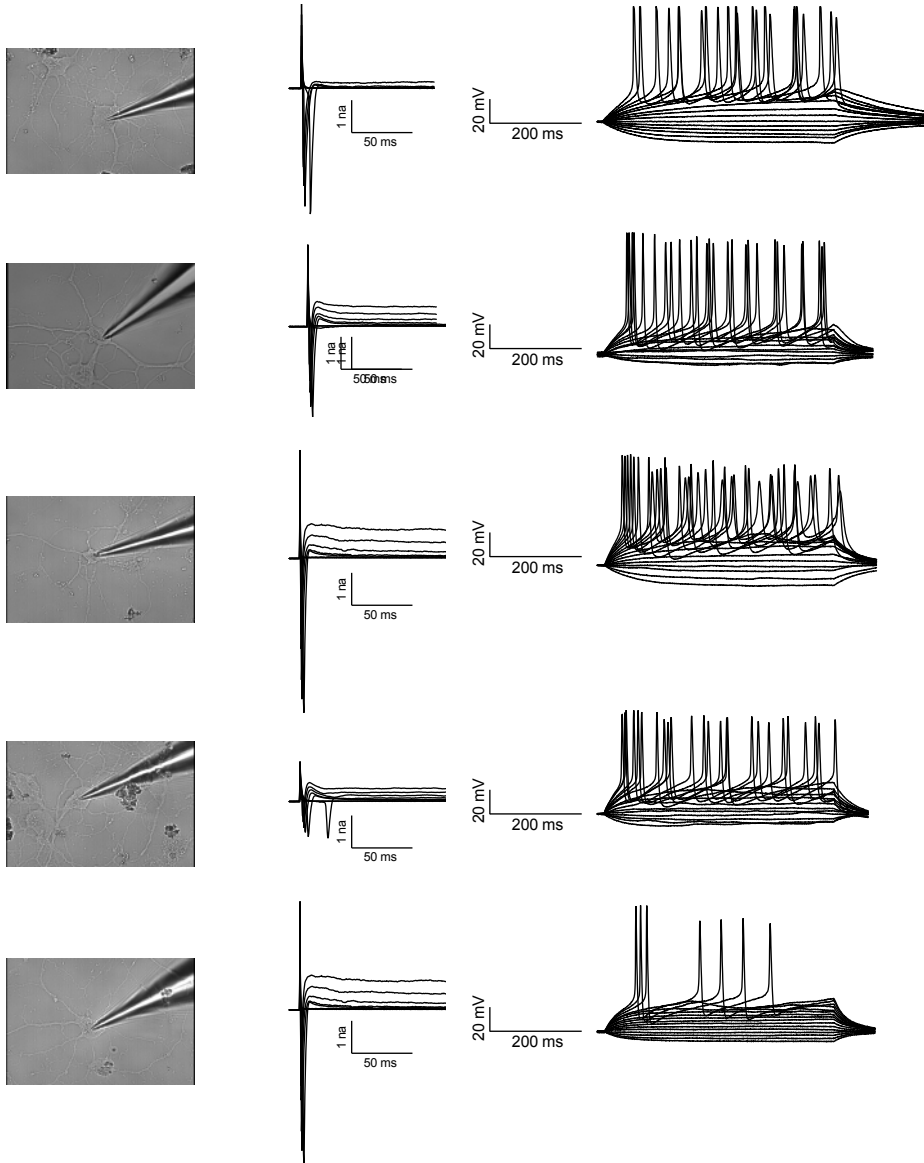

Figure S6

A

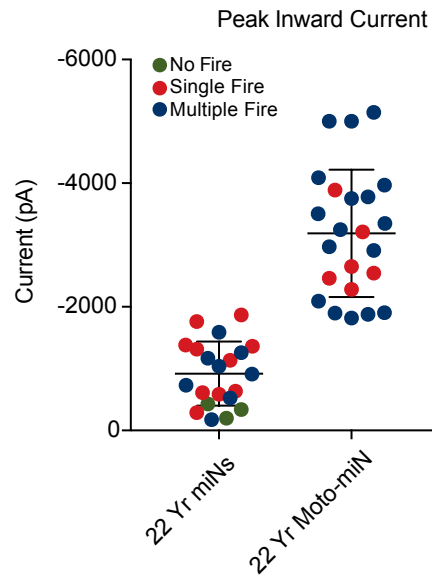

B

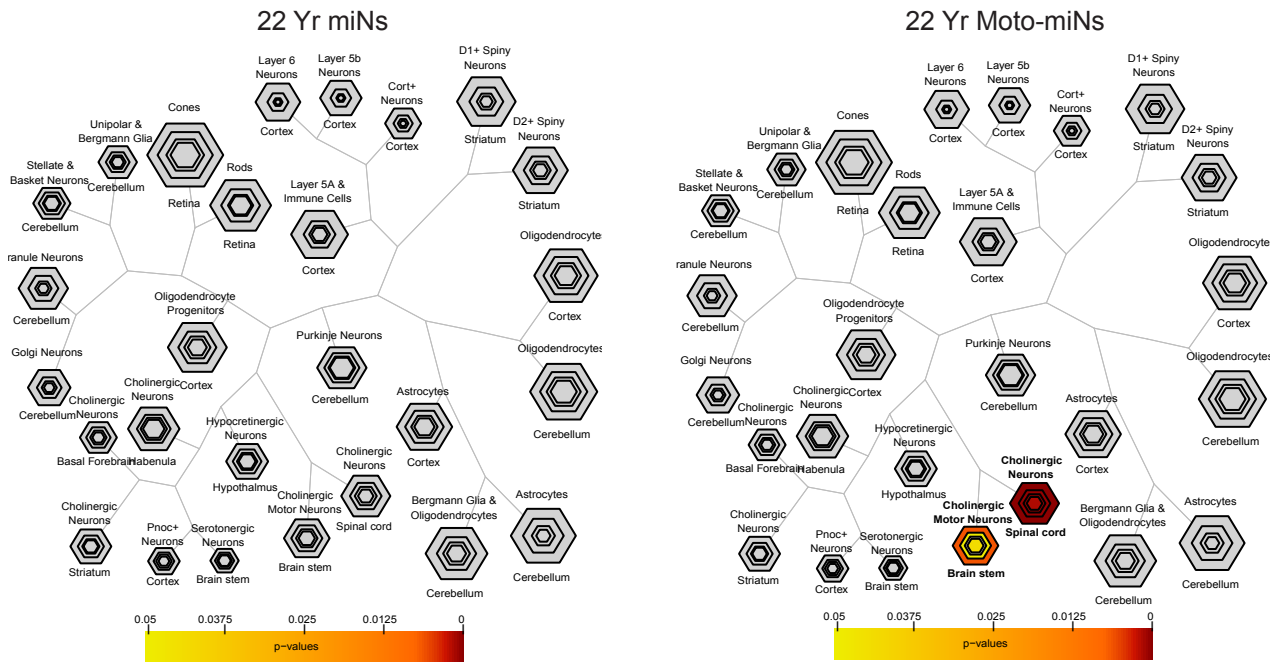

C

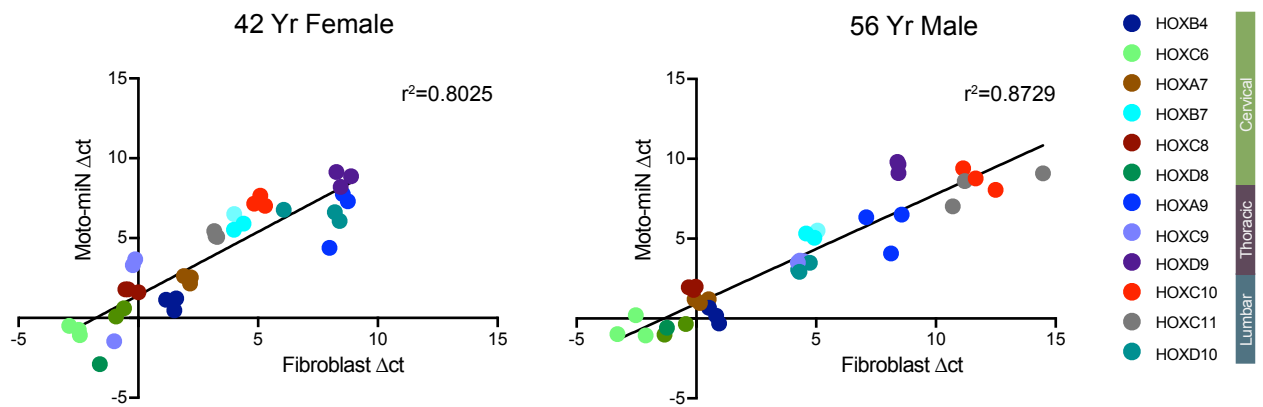



Figure S7

A

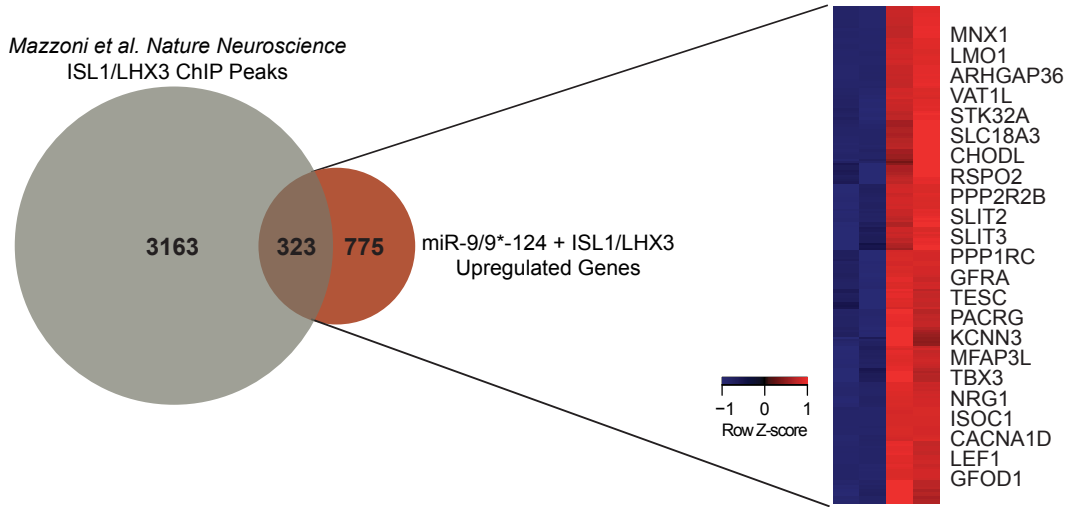

B

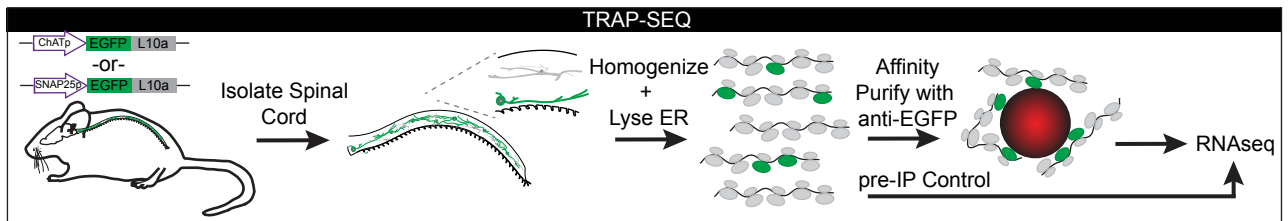

C

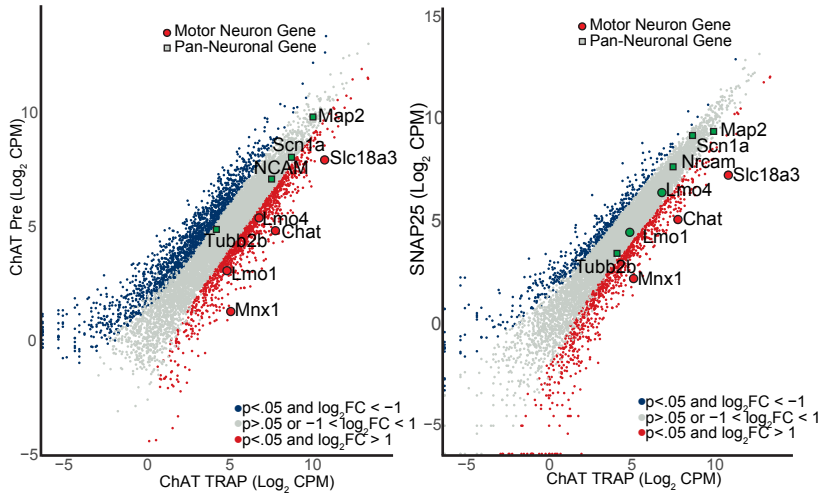

D

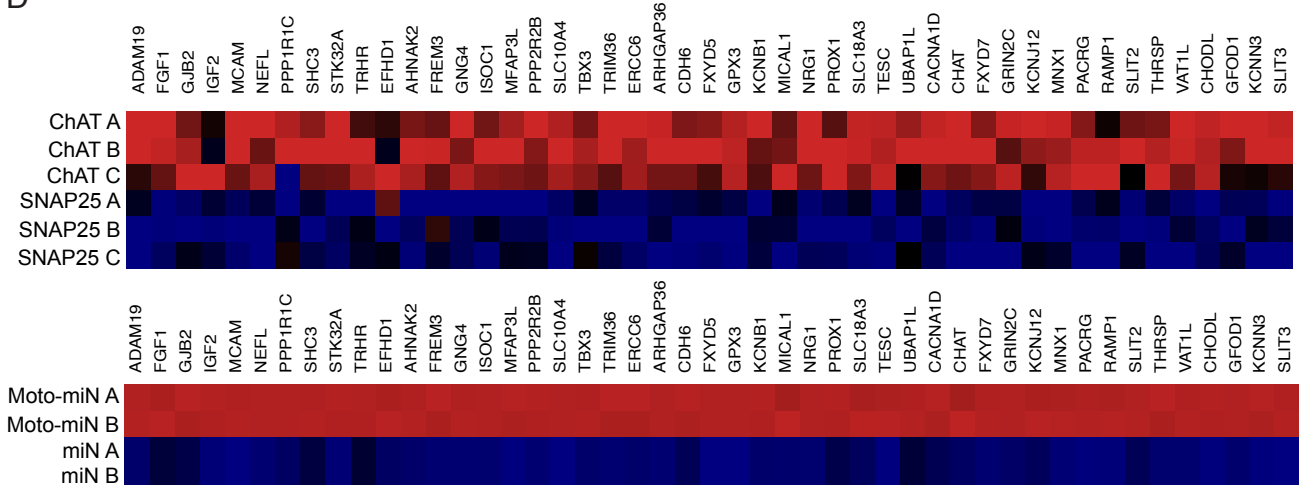

## Figure S1, Related to Figure 1

### MiRNA-Mediated Conversion into Neuronal Fate is Stable

(A) Detailed schematic of miR-9/9\*-124 direct conversion protocol.

(B) Combined plot of the current (I) - voltage (V) relationship for all neurons recorded.

(C) Tabulated values of resting membrane potentials in miNs.

(D) Gap-free recording of resting membrane potential in a miN.

(E) Tabulated values of capacitance values in miNs.

(F) MiR-9/9\*-124 was ectopically expressed under a doxycycline (DOX) inducible promoter in 22 year old human fibroblasts for 9 days then DOX was removed from the media at 3 day intervals. Cells were cultured until reprogramming day 30. Neuronal fate was assayed by immunostaining for the pan-neuronal marker MAP2 and the fibroblast identity was determined by FSP1 expression. Scale bar = 20 $\mu$ m. All data are represented as mean  $\pm$  SEM.

(G) MiR-9/9\*-124 was ectopically expressed under a DOX-inducible promoter in 22 year old human fibroblasts for 30 days then DOX was removed from the media and cells were cultured for an additional 30 days. Stable adoption of the neuronal fate was assayed by immunostaining for the pan-neuronal markers MAP2, NEUN, TUBB3 and NCAM. To assay if cells remained post-mitotic cells were stained with the proliferative marker ki-67. Scale bar = 20 $\mu$ m.

All data are represented as mean  $\pm$  SEM.

## Figure S2, Related to Figure 2

### Expression Changes in Epigenetic Modifiers During Reprogramming

Heatmaps show expression changes observed between miNs and fibroblasts within a subset of proteins that influence chromatin state through various modes.

## Figure S3, Related to Figure 5

### Pre-existing Heterochromatic Neuronal Loci Open in Response to miR-9/9\*-124 Expression.

(A) Top GO terms associated with promoter regions that close during reprogramming from fibroblasts to miNs.

(B) Closed regions in fibroblasts marked by H3K9me3 that open during neuronal reprogramming are enriched for neuronal GO terms.

(C) Closed regions in fibroblasts marked by H3K27me3 that open during reprogramming are also enriched for neuronal GO terms.

(D) Pre-existing distal H3K27ac and H3K4me1 marks within fibroblasts that close during neuronal reprogramming show GO terms related to general biological processes.

(E) Genome browser snapshots demonstrating closing and loss of fibroblast gene expression (*ECM1*, *MFAP5*, and *VIM*).

(F) Genome browser snapshots demonstrating neither opening or activation of progenitor genes (*SOX2*, *OLIG2* and *ASCL1*).

(G) Genome browser snapshots demonstrating neuronal subtype gene loci that open, but do not show gene expression changes (*GAD2* and *GABRA2*, GABAergic markers; *TH*, dopaminergic neuron marker). Shaded green: location of differential ATAC peaks detected.

## Figure S4, Related to Figure 5



### **Loss of BRG1 Prevents Neuronal Fate Acquisition**

- (A) BRG1 expression in human fibroblasts expressing shCTRL or shBRG1
- (B) Adult human fibroblasts ectopically expressing miR-9/9\*-124 and shBRG1 or shCTRL for 20 days, immunostained for the pan-neuronal marker MAP2 and fibroblast marker FSP1. Scale bars = 20 $\mu$ m.
- (C) Quantification of (B) MAP2 and FSP1 positive cells over total number of cells (DAPI). Scoring for MAP2-positive cells, only cells with processes at least three times the length of the soma were counted. Data are represented as mean  $\pm$  SEM. shBRG1 n = 155 cells, shCTRL, n = 173 cells,
- (D) Heatmaps showing ATAC signal intensity in open and close chromatin peaks in shBRG1 and shCTRL. All open and closed chromatin regions were ranked according to maximum intensity across all samples.
- (E) The genomic distribution of ATAC signals in cells expressing miR-9/9\*-124 and shCTRL or shBRG1.
- (F) GO terms showing biological function of closed (lost in shBRG1, red) and open (retained in shBRG1, blue) regions.

### **Figure S5, Related to Figure 6**

#### **Identification of Transcription Factors For Defining Motor Neuron Specific Conversion**

- (A) Candidate motor neuron transcription factors and combinations co-expressed with miR-9/9\*-124 in human fibroblasts.
- (B) Immunocytochemistry of adult human fibroblasts overexpressing a non-specific miRNA (miR-NS) and ISL1/LHX3 (left) or miR-9/9\*-124 and ISL1/LHX3 (right) for 35 days. Images demonstrate the necessity of miR-9/9\*-124 for opening the neurogenic potential of human fibroblasts. Scale bar = 20 $\mu$ m.
- (C) Additional representative inward/outward whole-cell currents and repetitive AP waveforms generated from whole cell patch clamp recordings of Moto-miNs. Images show the patch clamped cells.

### **Figure S6, Related to Figure 7**

#### **Addition of ISL1/LHX3 to miR-9/9\*-124 Increases Functional Maturity and Generates Motor Neuron Transcriptional Network**

- (A) Peak inward current measured during voltage clamp mode of miNs and Moto-miNs reveals increased peak inward current in Moto-miNs (-3,189 pA  $\pm$  214 pA) compared to miNs (-919 pA  $\pm$  113 pA). Data are represented as mean  $\pm$  SEM.
- (B) Cell Type-specific Enrichment Analysis (CSEA) tool reveals the top 100 most significantly expressed genes in miNs do not enrich for defined neuronal subtypes (left), while the top 100 most significantly expressed genes in Moto-miNs are enriched in cholinergic motor neurons in the brain stem and spinal cord.
- (C) HOX gene expression analysis by qRT-PCR in 42-year-old female and 56-year-old male donor fibroblasts before and after conversion confirms that Moto-miNs retain donor fibroblast HOX gene expression patterns. Data represent  $\Delta$ CT values for each biological replicate (3 separate Moto-miN conversions).

### **Figure S7, Related to Figure 7**

#### **Direct Comparison of Moto-miN Transcriptome to *in vivo* Mouse Motor Neurons by Translating Ribosomal Affinity Purification (TRAP) Sequencing.**

(A) Venn Diagram depicting the number of ISL1/LHX3 ChIP-seq peaks identified by *Mazzoni et al.* during ISL1/LHX3 directed ES to motor neuron differentiation (3,486) and genes enriched in Moto-miN transcriptome (775). Heatmap shows overlapping activated genes (323) include hallmark motor neuron markers.

(B) Schematic of TRAP-Seq strategy used to identify transcripts in all neurons (SNAP-25 genetic driver) and motor neurons (CHAT genetic driver) in mouse spinal cord. TRAP is a method to precipitate actively translated mRNA bound to ribosomes using an antibody to EGFP-L10A.

(C) Pairwise comparisons between mean expression values in CHAT IP v. Pre-IP (left) and CHAT IP v. SNAP25 IP (right). Differentially expressed genes are shown in red ( $\log_{2}FC > 1$  and  $p < 0.05$ ) and blue ( $\log_{2}FC < -1$  and  $p < 0.05$ ).

(D) Example mean expression values of overlapping genes between human (Moto-miNs versus miNs) and mouse (all spinal cord neurons SNAP25-TRAP) and motor neurons (ChAT-TRAP) datasets.

### Supplemental Table 1, related to STAR Methods section. Primer sequences used for qRT PCR analysis

| Primer Name | Sequence (5'-3')        |
|-------------|-------------------------|
| S100A4 FWD  | GATGAGCAACTTGGACAGCAA   |
| S100A4 REV  | CTGGGCTGCTTATCTGGGAAG   |
| VIM FWD     | AGTCCACTGAGTACCGGAGAC   |
| VIM REV     | CATTTACGCATCTGGCGTTC    |
| COL13A1 FWD | GGAGACGGCTATTTTGGGACG   |
| COL13A1 REV | TCCTTGAGTGGAGCTTCCATT   |
| ChAT FWD    | TCAATCATGTCCAGCGAGTC    |
| ChAT REV    | AACGAGGACGAGCGTTTG      |
| HB9 FWD     | CTCCTACTCGTACCCGCAG     |
| HB9 REV     | TTGAAGTCGGGCATCTTAGGC   |
| SLC18A3 FWD | TTCGCCTCTACAGTCCTGTTC   |
| SLC18A3 REV | GCTCCTCCGGGTAATTATCG    |
| HOXB4 FWD   | CGTGAGCACGGTAAACCCC     |
| HOXB4 REV   | CGAGCGGATCTTGGTGTTG     |
| HOXC6 FWD   | ACAGACCTCAATCGCTCAGGA   |
| HOXC6 REV   | AGGGGTAAATCTGGATACTGGC  |
| HOXA7 FWD   | CGTTCCGGGCTTATACAATGT   |
| HOXA7 REV   | CTCGTCCGTCTTGTCGCAG     |
| HOXB7 FWD   | TTCCCAGAACAACTTCTTGTGC  |
| HOXB7 REV   | GCATGTTGAAGGAACTCGGCT   |
| HOXC8 FWD   | ACCGGCCTATTACGACTGC     |
| HOXC8 REV   | TGCTGGTAGCCTGAGTTGGA    |
| HOXD8 FWD   | GGAAGACAAACCTACAGTCGC   |
| HOXD8 REV   | TCCTGGTCAGATAGGGGTTAAAA |
| HOXA9 FWD   | TACGTGGACTCGTTCCTGCT    |
| HOXA9 REV   | CGTCGCCTTGGACTGGAAG     |
| HOXC9 FWD   | ACTCGCTCATCTCTCACGACA   |
| HOXC9 REV   | GACGGAAAATCGCTACAGTCC   |
| HOXD9 FWD   | GGAAGACAAACCTACAGTCGC   |

|            |                          |
|------------|--------------------------|
| HOXD9 REV  | GCAAAACTACACGAGGCGAA     |
| HOXC10 FWD | ACATGCCCTCGCAATGTA ACT   |
| HOXC10 REV | GAGAGGTAGGACGGATAGGTG    |
| HOXC11 FWD | ATGTTTAACTCGGTCAACCTGG   |
| HOXC11 REV | GCATGTAGTAAGTGCAACTGGG   |
| HOXD11 FWD | TCTCCGAGTCCTCGTGGGGA     |
| HOXD11 REV | GCAAAACACCAGCGCCTTCTA    |
| HPRT FWD   | TCCTTGGTCAGGCAGTATAATCC  |
| HPRT REV   | GTCAAGGGCATATCCTACAACAAA |
